# Supplementary material
Source: PubMed Central journal article supplement (PMC4390516)
Supplement: NIHMS667078-supplement-Supplement.pdf [file NIHMS667078-supplement-Supplement.pdf]

## SUPPLEMENTAL FIGURES

WT: CTGGG  
WT: *taagctcgctttcttgctgtccaatttctattaaggttcctttgttccttaagtccaactactaaactgggggatattatgaaggcccttgagcatctggattctgcctaataaaaaacatttatttcattgcaaaaaaaaaaaaaaaaa*  
XM: *taagctcgctttcttgctgtccaatttctattaaggttcctttgttccttaagtccaactactaaagacccggatattatgaaggcccttgagcatctggattctgcctaataaaaaacatttatttcattgcaaaaaaaaaaaaaaaaa*  
XM: GACCC

### Supplemental Figure 1. Comparison of $\beta^{\text{WT}}$ and $\beta^{\text{XM}}$ 3'UTR sequences.

The location and the composition of the 5-nt XM mutation (GACCC), the translation termination codon (*taa*), and poly(A) tail (aaa) are indicated.

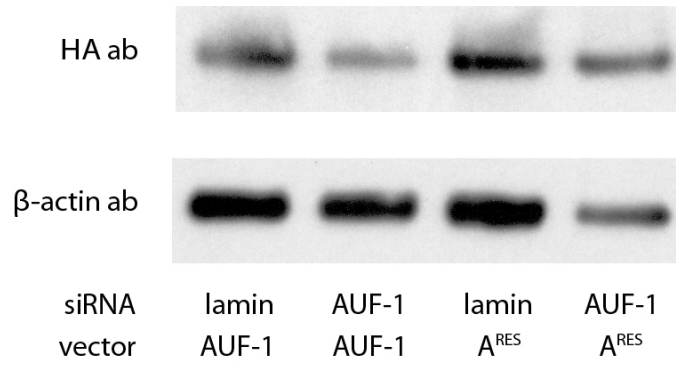

**Supplemental Figure 2. Translation of wild-type and siRNA-resistant HA-AUF-1 mRNAs.**

K562 cells were co-transfected with siRNAs targeting AUF-1 or control lamin mRNAs, and with vectors encoding either wild-type HA-AUF-1 (AUF-1) or siRNA-resistant HA-AUF-1 (A<sup>RES</sup>). Protein extracts were subjected to Western transfer analysis using HA and control actin antibodies.

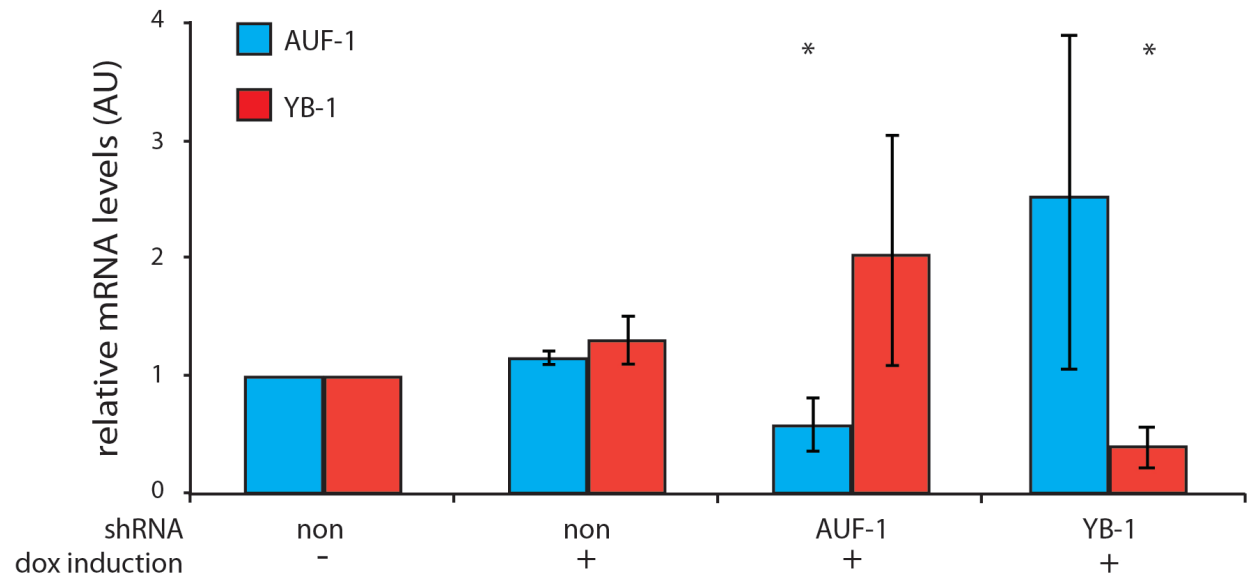

**Supplemental Figure 3. Efficacy and specificity of shRNA-mediated knock-down of AUF-1 and YB-1.**

Experiments used K562 cells that stably expressed dox-inducible shRNAs targeting AUF-1 mRNA, YB-1 mRNA, or a control non-silencing RNA sequence. shRNA expression was induced with dox and cells harvested 72 hr later. RT-qPCR quantifications were conducted with AUF-1- and YB-1-specific primers, and values normalized to the average values for control GAPDH and  $\beta$ -actin mRNAs. The level of each mRNA in uninduced cells transduced with the non-silencing shRNA was arbitrarily assigned unit value. Bars represent the mean $\pm$ SEM values for 3 independent experiments. \* $p$ <0.05 relative to cells transduced with the non-silencing shRNA.

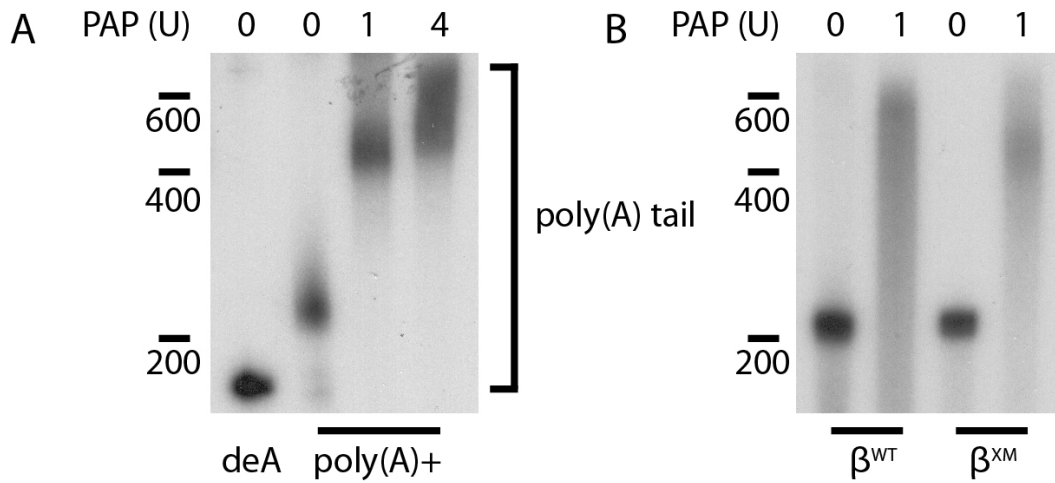

**Supplemental Figure 4. Generation of  $\beta$ -globin 3'UTR probes with variable poly(A) tail lengths.**

**(A)** A [ $^{32}\text{P}$ ]-labeled  $\beta$ -globin 3'UTR RNA probe containing a 18-nt poly(A) tail was incubated for 10 min at 37°C with ATP and either 1 U or 4 U of poly(A) polymerase (PAP). Reactions were analyzed on a 6%/8M polyacrylamide/urea gel. Marker on the left indicates RNA length in nucleotides.

**(B)** As in panel A: [ $^{32}\text{P}$ ]-labeled  $\beta^{\text{WT}}$  and  $\beta^{\text{XM}}$  3'UTR probes containing 18-nt poly(A) tails were incubated with 1 U PAP and resolved by denaturing polyacrylamide electrophoresis.
